# Supplementary material for: Mouse medulloblastoma driven by CRISPR activation of cellular Myc
Source: PubMed Central journal article supplement (PMC5992137; doi:10.1038/s41598-018-24956-1), 2018-06-07
Supplement: 41598_2018_24956_MOESM1_ESM.pdf [file 41598_2018_24956_MOESM1_ESM.pdf]

## **Supplementary Information**

### **Mouse medulloblastoma driven by CRISPR activation of cellular *Myc***

BaoHan T. Vo, Jin Ah Kwon, Chunliang Li, David Finkelstein, Beisi Xu, Brent A. Orr, Charles  
J. Sherr & Martine F. Roussel

**Figure S1.** Epigenetic profiles of the Myc gene in different mouse G3 tumors. ChIP-Seq data of H3K27ac marks in tumor cells from three mouse Retro-Myc G3 MBs (MB1, MB2 and MB3) cell lines and neurosphere cells (NS) in the open chromatin region of the mouse Myc promoter. ATAC-Seq of MEF and mES cells. The location of the Myc promoter region used for the design of sgRNAs is noted by the highlighted black box.

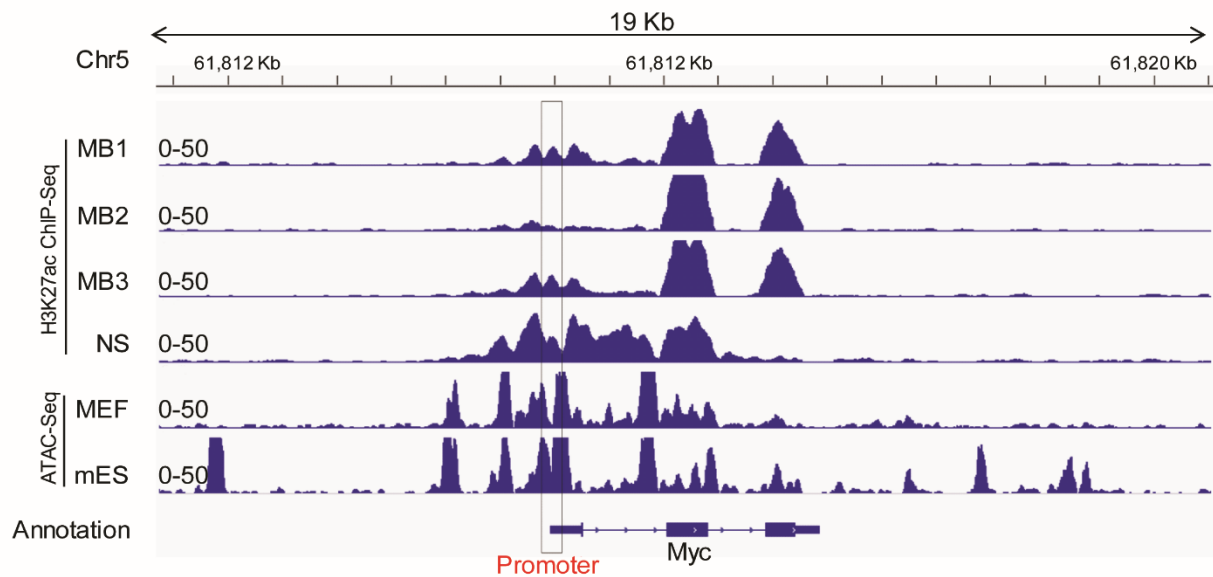

**Figure S2.** Quantitative RT-PCR of Myc expression in NIH3T3 cells. NIH3T3 cells transfected with U6, sgRNA-M5, M7 or M9 and primers that specifically bind to the 3'UTR (**a**) or the coding region (**b**) of the Myc promoter. Data are represented as the mean  $\pm$  SEM.

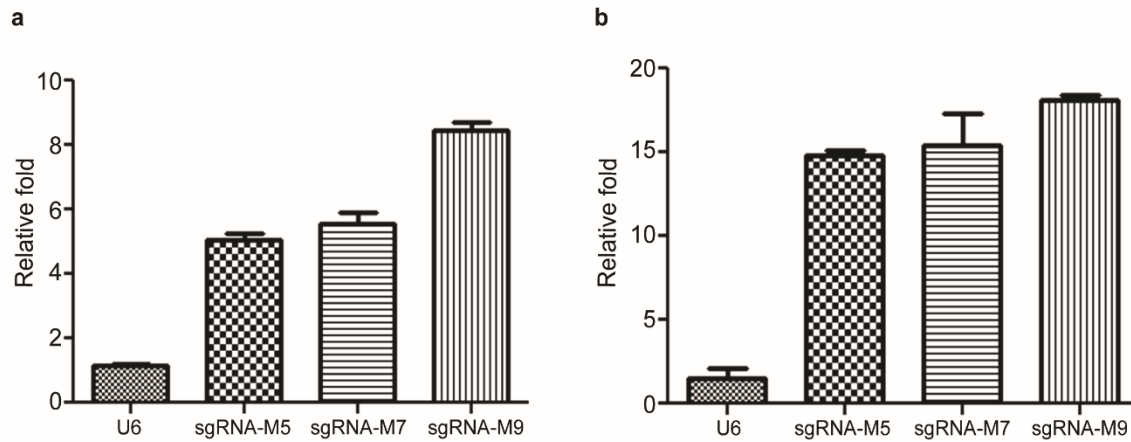

**Figure S3.** Characterization of the binding affinity of sgRNA-M5, 7 and 9 with dCas9-VP64 system, and indel frequency with wild type Cas9. ChIP-Seq data of H3K27ac marks in mouse neurosphere cells (NS), primary purified G3 tumor cells (G3 tumors), tumor cells from three Retro-Myc G3 MBs (MB1, MB2 and MB3) cell lines, and *Trp53*-null NS infected with lentiviruses expressing dCas9 and sgRNA-M5, 7, or 9. Top three off-target sites are located in genes *Gprc5c*, *Cystm1* and *Smyd5* identified by dCas9 ChIP-Seq in sgRNA-M7.

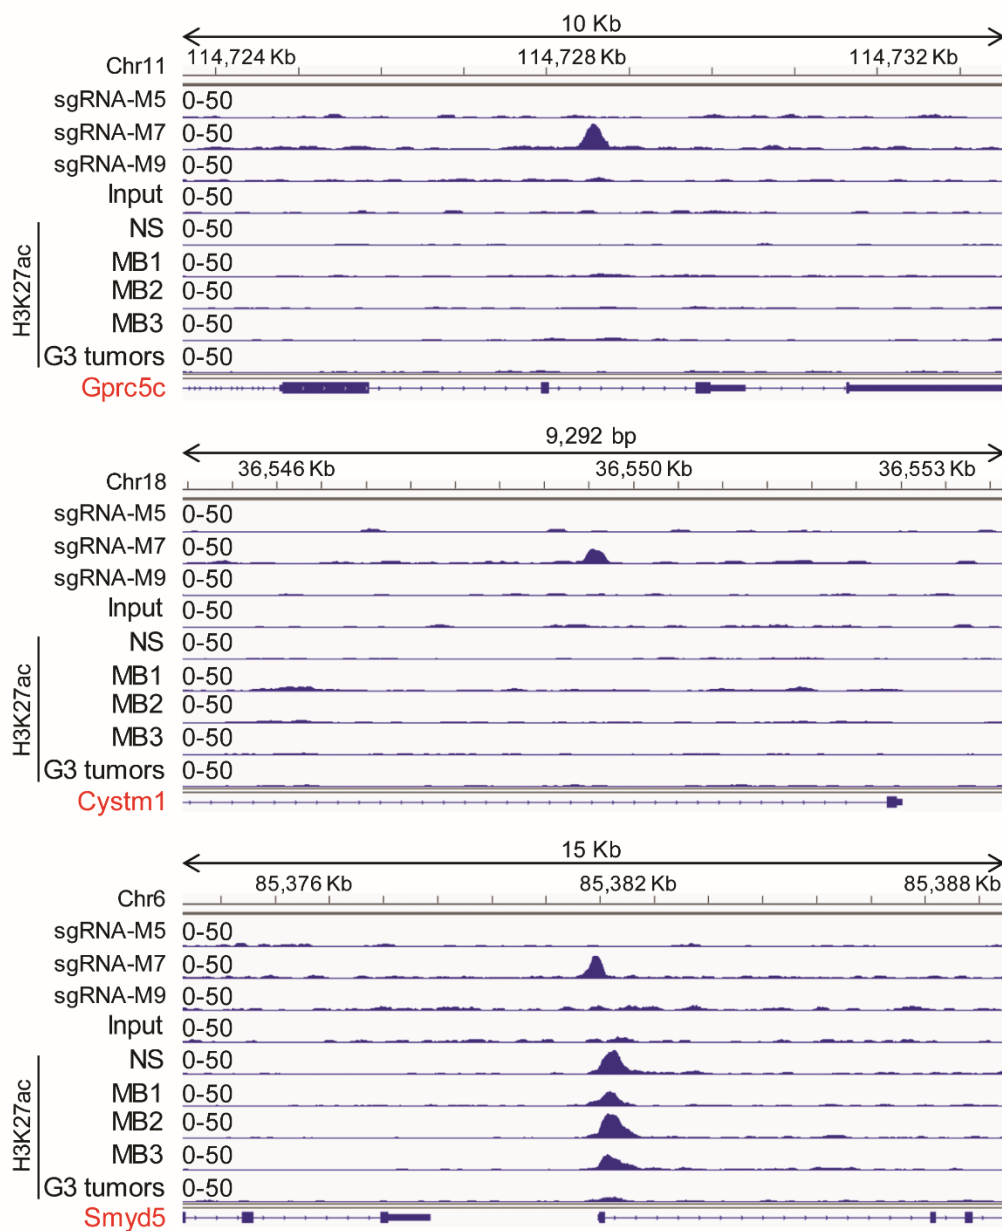

**Figure S4.** Full-length scan of immunoblots. Correspond to data presented in cropped Figure 1e.

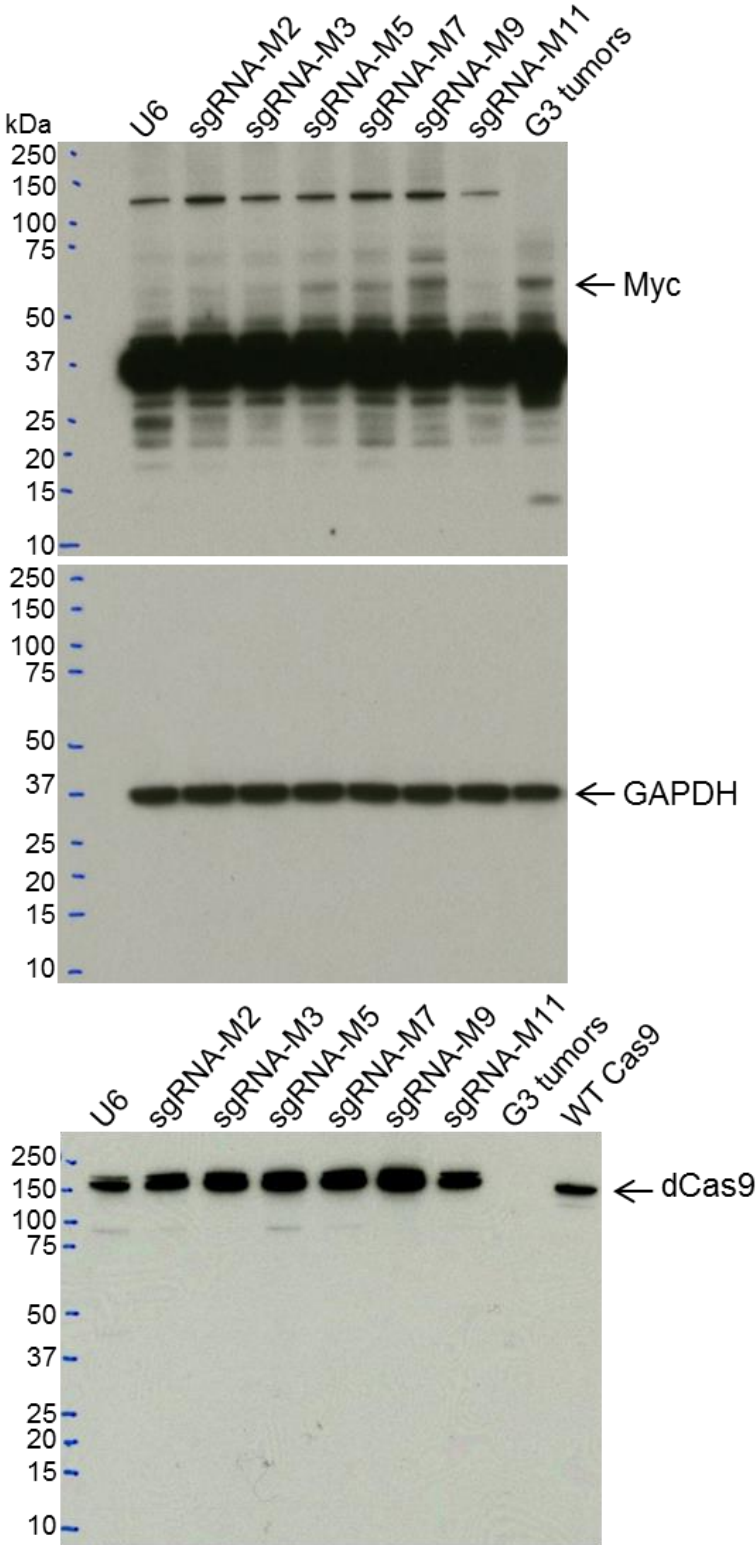

**Figure S5.** Full-length scan of immunoblots. Correspond to data presented in cropped Figure 2a.

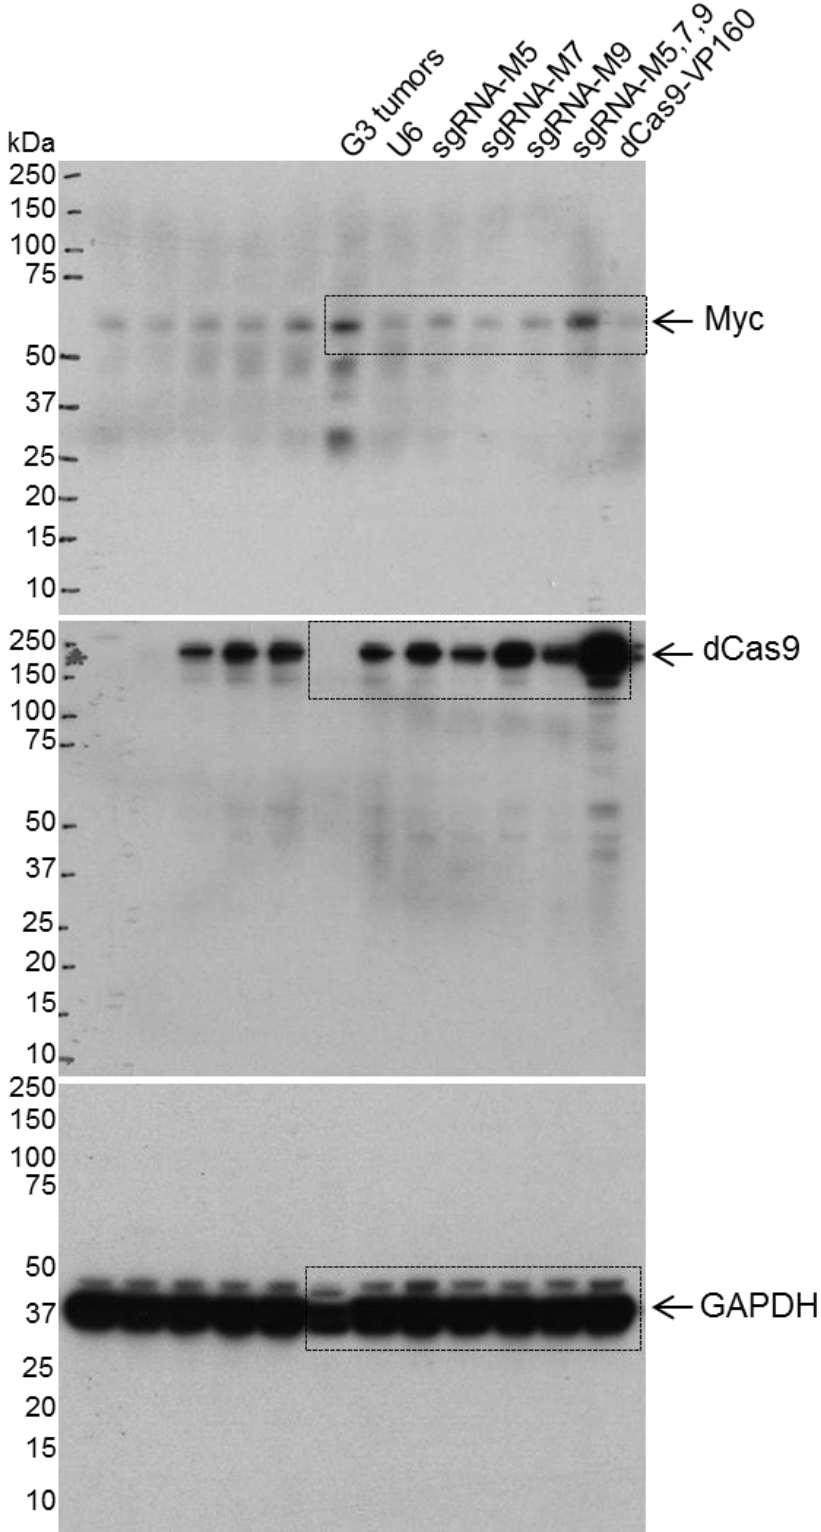

**Figure S6.** Full-length scan of agarose gel. Correspond to data presented in Figure 4a.

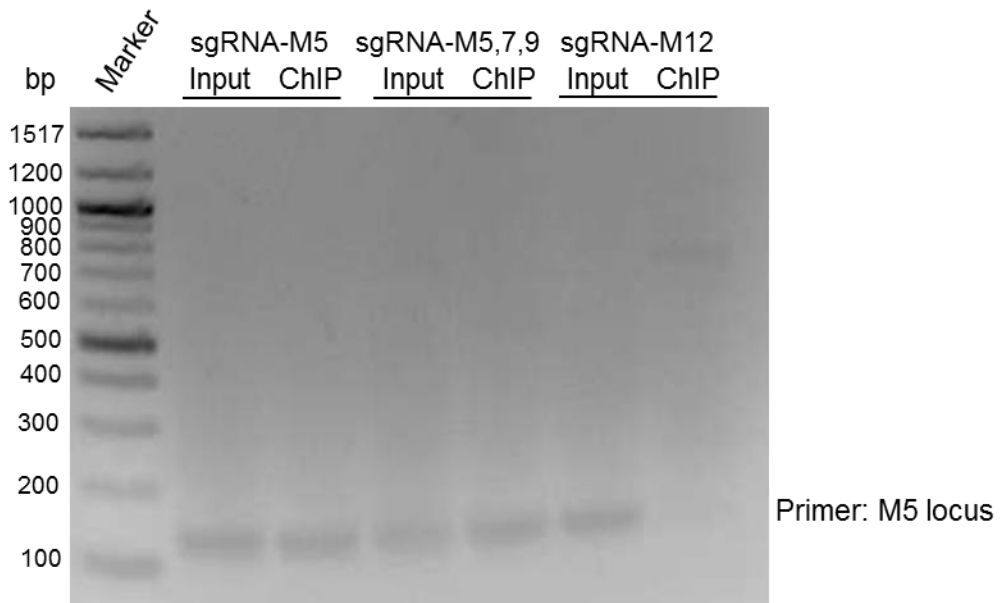

**Figure S7.** Full-length scan of immunoblots. Correspond to data presented in Figure 5a.

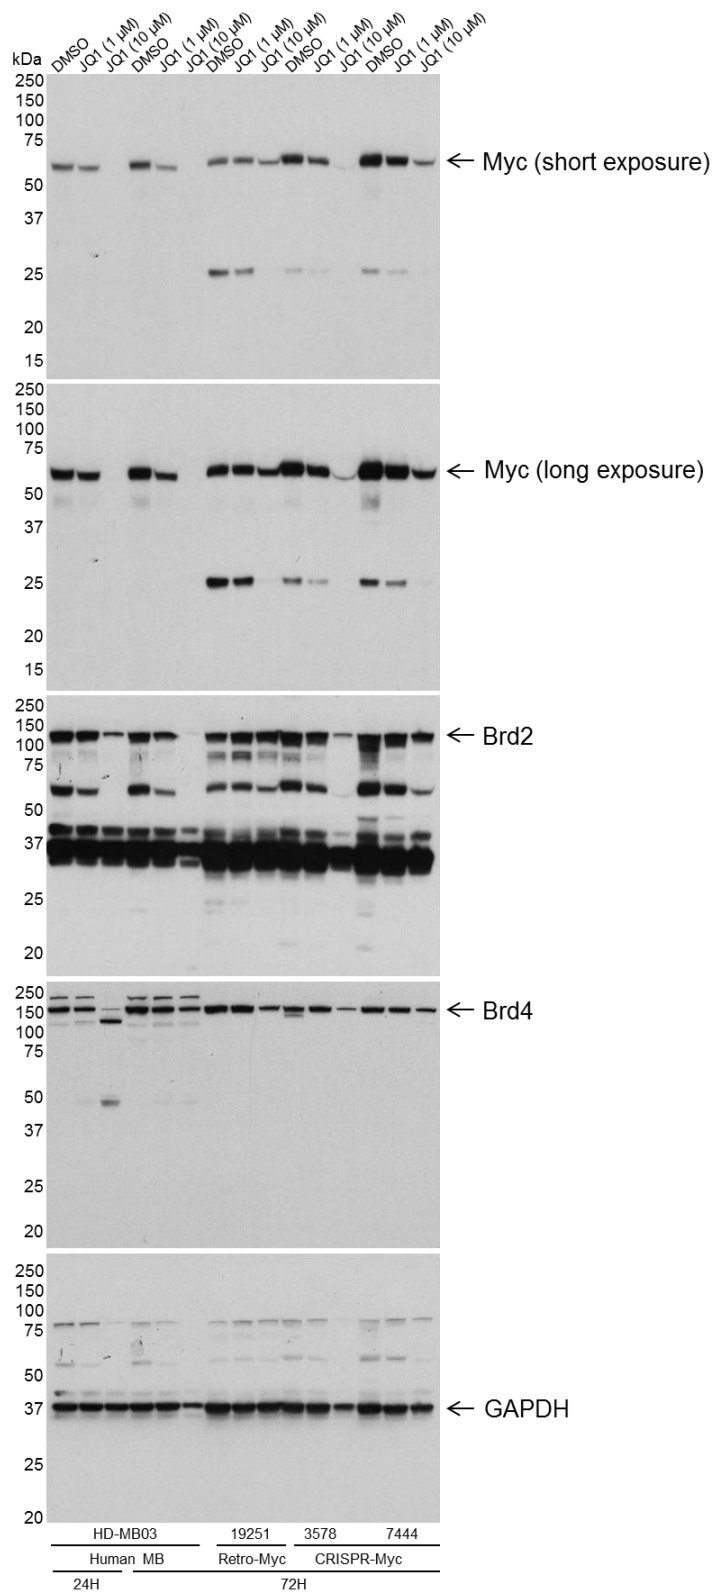



**Supplementary Table S1. Oligomers used to generate target-specific sgRNA vectors.**

| <b>Name</b> | <b>Sequence 5' to 3'</b> |
|-------------|--------------------------|
| sgRNA-M2    | GCTGATGTTGGGTCAGTCGC     |
| sgRNA-M3    | TCTTAGGTCGCCCCGGAGCG     |
| sgRNA-M5    | GGCAGGGCTTCGCCGACGCT     |
| sgRNA-M7    | AAATAGAGAGAGGTGGGGAA     |
| sgRNA-M9    | ACACCCCGGAGCCGGAGTAC     |
| sgRNA-M11   | GGTTGTTCGGGCGCAGCGCT     |
| TALE-TF-1   | TCAGCTCCCCTCCTGCCTCC     |
| TALE-TF-2   | TGAAGGGCAGGGCTTCGCCG     |
| TALE-TF-3   | TTCTCTGGCTAATCCCCGCC     |
| TALE-TF-4   | TAGAGAGAGGTGGGGAAGGG     |
| TALE-TF-8   | TACACCCCGGAGCCGGAGTA     |
